# Supplementary material for: Interfacial Adhesion of Thick NiTi Coating on Substrate Stainless Steel
Source: MDPI journal article supplement (doi:10.3390/ma15238598), 2022-12-02
Supplement: s1 [file s1]

Supplementary files

Sample 1 : elemental composition

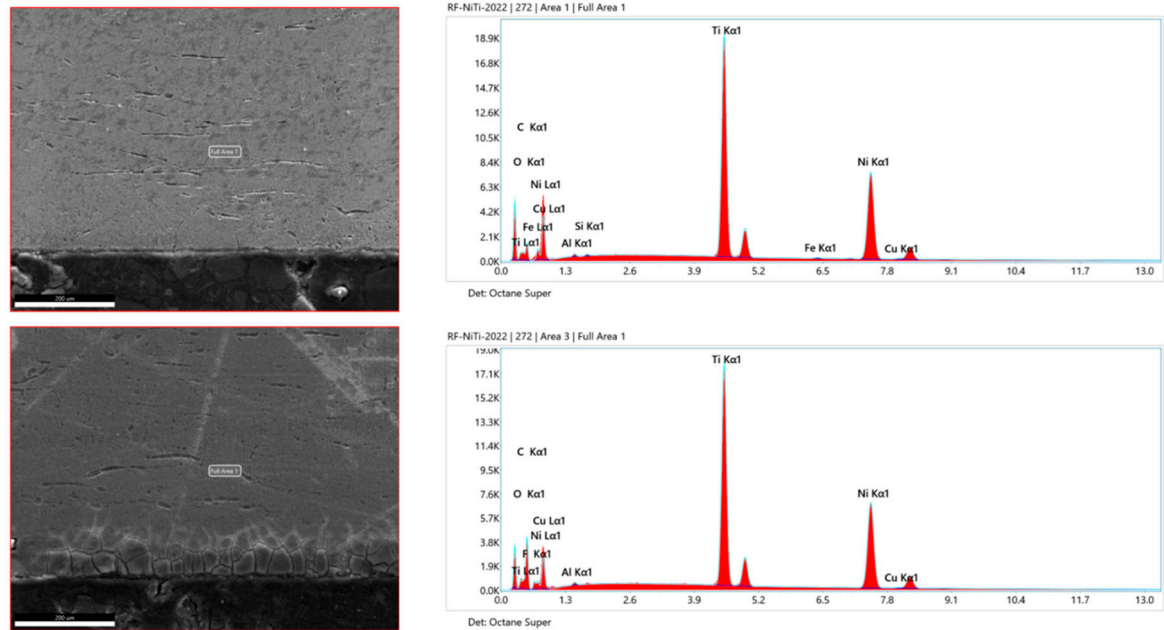

Sample 1: Line analysis

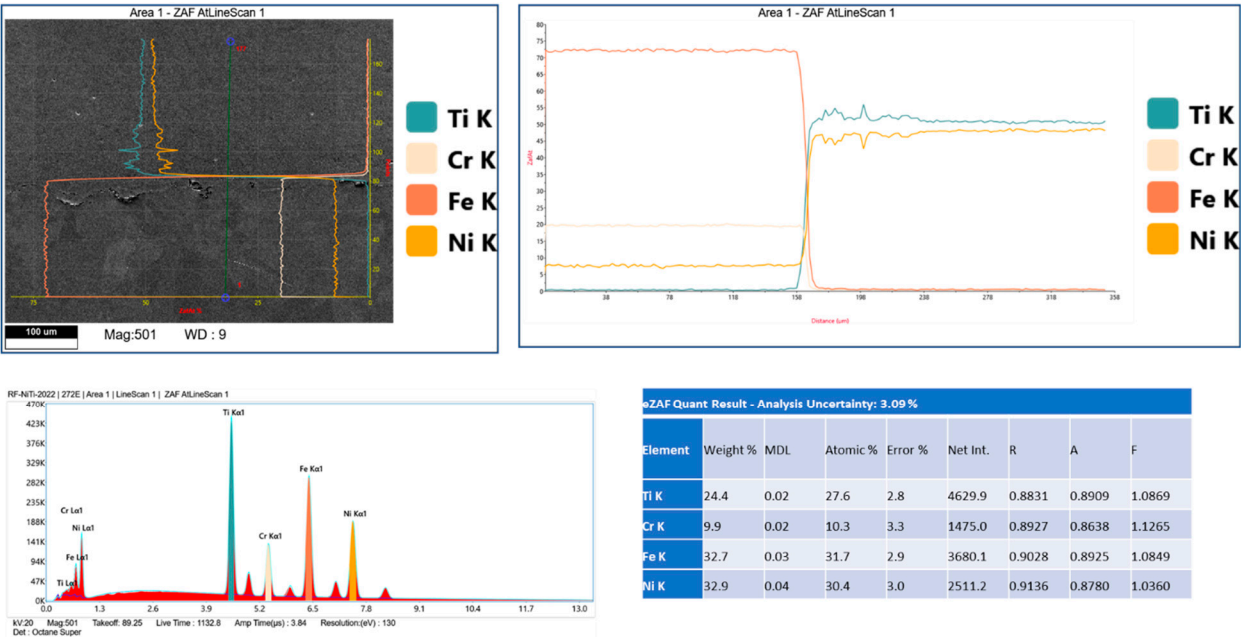

Sample 2 : Line analysis

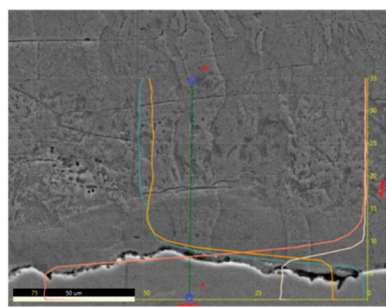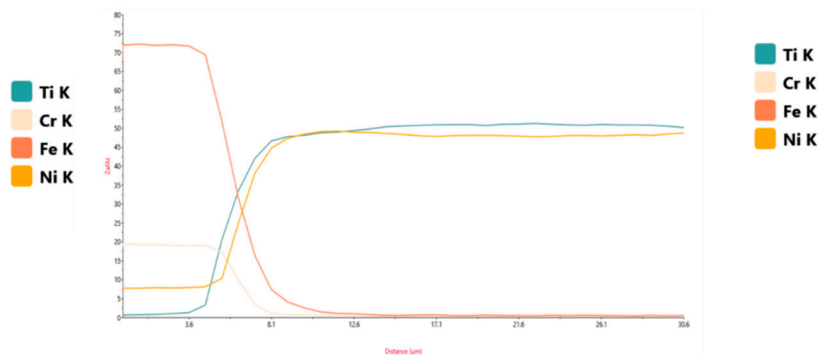

Composition

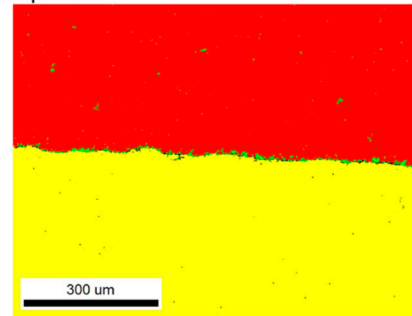

Gray Scale Map Type: <none>

Color Coded Map Type: Phase

| Phase                      | Total Fraction | Partition Fraction |
|----------------------------|----------------|--------------------|
| Fe (gamma, austenite, fcc) | 0.480          | 0.480              |
| Fe (alpha, ferrite, bcc)   | 0.006          | 0.006              |
| Ni Ti (nitinol)            | 0.512          | 0.512              |

Boundaries: <none>
